# Supplementary material
Source: HighWire-hosted journal article supplement (https://bmjopen.bmj.com/content/11/1/e038707)
Supplement: inline-supplementary-material-2 [file inline-supplementary-material-2.pdf]

**Supplemental Table 2.** Change in EQ-5D and the dimensions of the EQ-5D over time in multivariable linear and logistic mixed models.

|                                                                             | 1 month vs 1 week  | 3 months vs 1 month | 6 months vs 3 months | 12 months vs 6 months | 24 months vs 12 months |
|-----------------------------------------------------------------------------|--------------------|---------------------|----------------------|-----------------------|------------------------|
| <b>Linear regression coefficients (95% Confidence Interval)<sup>a</sup></b> |                    |                     |                      |                       |                        |
| EQ-5D utility score                                                         | 0.13 (0.12, 0.14)* | 0.12 (0.11, 0.13)*  | 0.06 (0.05, 0.07)*   | 0.01 (0.00, 0.02)*    | 0.00 (-0.01, 0.02)     |
| EQ-VAS                                                                      | 8.48 (7.70, 9.26)* | 5.97 (5.28, 6.69)*  | 3.12 (2.36, 3.87)*   | 0.24 (-0.52, 1.01)    | 0.98 (0.19, 1.76)*     |
| <b>Odds Ratios (95% Confidence Interval)<sup>a</sup></b>                    |                    |                     |                      |                       |                        |
| Mobility                                                                    | 0.51 (0.41, 0.63)* | 0.38 (0.32, 0.46)*  | 0.38 (0.31, 0.46)*   | 0.85 (0.70, 1.03)     | 0.79 (0.65, 0.97)*     |
| Self-care                                                                   | 0.25 (0.21, 0.30)* | 0.14 (0.12, 0.17)*  | 0.34 (0.28, 0.41)*   | 0.73 (0.59, 0.91)*    | 1.03 (0.82, 1.30)      |
| Usual activities                                                            | 0.67 (0.54, 0.83)* | 0.22 (0.19, 0.27)*  | 0.31 (0.26, 0.37)*   | 0.61 (0.52, 0.73)*    | 0.82 (0.69, 0.98)*     |
| Pain/discomfort                                                             | 0.46 (0.37, 0.56)* | 0.36 (0.30, 0.42)*  | 0.51 (0.44, 0.61)*   | 0.68 (0.58, 0.80)*    | 0.84 (0.71, 1.00)*     |
| Anxiety/depression                                                          | 0.99 (0.82, 1.21)  | 0.70 (0.59, 0.84)*  | 0.70 (0.58, 0.85)*   | 0.83 (0.68, 1.02)     | 0.89 (0.72, 1.11)      |
| Cognition                                                                   | 0.85 (0.68, 1.06)  | 0.91 (0.75, 1.12)   | 0.62 (0.49, 0.77)*   | 1.09 (0.86, 1.38)     | 1.15 (0.91, 1.45)      |

Time was included as categorical variable in the analyses

\*p-value ≤ .05

<sup>a</sup>Regression coefficients and odds ratios in longitudinal analyses adjusted for sex, age, American Society of Anaesthesiologists Classification, Injury Severity Score, length of stay at hospital, Functional Capacity Index, Injury classifications, admission to intensive care unit, pre-injury work status, educational level, frailty and pre-injury status
