# Supplementary material
Source: HighWire-hosted journal article supplement (https://bmjopen.bmj.com/content/11/1/e038707)
Supplement: inline-supplementary-material-3 [file inline-supplementary-material-3.pdf]

**Supplemental Table 3.** Regression coefficients in univariable linear mixed models for the EQ-5D utility and the EQ-VAS and odds ratios in univariable logistic mixed models for the dimensions of HS.

|                                          | During the first two years after injury |                          |                         |                       |                       |                    |                      |                       |
|------------------------------------------|-----------------------------------------|--------------------------|-------------------------|-----------------------|-----------------------|--------------------|----------------------|-----------------------|
|                                          | Linear regression coefficients (95% CI) |                          | Odds Ratios (95% CI)    |                       |                       |                    |                      |                       |
|                                          | EQ-5D utility                           | EQ-VAS                   | Mobility                | Self-care             | Usual activities      | Pain/discomfort    | Anxiety/depression   | Cognition             |
| <b>Female sex</b>                        | -0.11 (-0.12, -0.10)*                   | -6.37 (-7.42, -5.32)*    | 4.57 (3.73, 5.61)*      | 3.04 (2.62, 3.53)*    | 3.20 (2.78, 3.68)*    | 2.46 (2.15, 2.82)* | 4.28 (3.48, 5.28)*   | 4.95 (3.71, 6.60)*    |
| <b>Age (years)</b>                       |                                         |                          |                         |                       |                       |                    |                      |                       |
| 18 - 24                                  | Ref                                     | Ref                      | Ref                     | Ref                   | Ref                   | Ref                | Ref                  | Ref                   |
| 25 - 44                                  | -0.03 (-0.07, 0.01)                     | -1.59 (-4.66, 1.47)      | 2.08 (1.18, 3.64)*      | 1.59 (1.03, 2.46)*    | 1.83 (1.22, 2.74)*    | 1.72 (1.15, 2.59)* | 0.93 (0.52, 1.67)    | 0.71 (0.34, 1.52)     |
| 45 - 64                                  | -0.02 (-0.06, 0.01)                     | -3.69 (-6.50, -0.88)*    | 4.59 (2.74, 7.68)*      | 2.08 (1.40, 3.10)*    | 1.86 (1.29, 2.69)*    | 1.82 (1.26, 2.63)* | 0.58 (0.34, 0.98)*   | 0.43 (0.22, 0.86)*    |
| 65 - 74                                  | -0.02 (-0.06, 0.02)                     | -2.47 (-5.35, 0.41)      | 10.91 (6.42, 18.56)*    | 2.78 (1.85, 4.18)*    | 1.77 (1.21, 2.58)*    | 1.63 (1.12, 2.37)* | 0.39 (0.23, 0.68)*   | 0.39 (0.20, 0.79)*    |
| ≥ 75                                     | -0.16 (-0.19, -0.12)*                   | -12.78 (-15.58, -9.98)*  | 105.71 (61.48, 181.77)* | 14.70 (9.83, 21.98)*  | 6.29 (4.34, 9.1)*     | 2.50 (1.73, 3.60)* | 2.07 (1.23, 3.49)*   | 12.86 (6.37, 25.98)*  |
| <b>Nr of comorbidities</b>               |                                         |                          |                         |                       |                       |                    |                      |                       |
| 0                                        | Ref                                     | Ref                      | Ref                     | Ref                   | Ref                   | Ref                | Ref                  | Ref                   |
| 1                                        | -0.08 (-0.10, -0.06)*                   | -7.86 (-9.05, -6.66)*    | 5.41 (4.26, 6.87)*      | 2.45 (2.06, 2.91)*    | 2.14 (1.82, 2.51)*    | 1.75 (1.49, 2.05)* | 2.54 (1.98, 3.24)*   | 5.41 (3.88, 7.53)*    |
| ≥2                                       | -0.21 (-0.22, -0.19)*                   | -16.02 (-17.20, -14.84)* | 36.44 (27.79, 47.78)*   | 8.45 (7.07, 10.10)*   | 7.16 (6.03, 8.51)*    | 4.70 (3.97, 5.57)* | 9.32 (7.25, 11.97)*  | 45.33 (30.83, 66.64)* |
| <b>Injury Severity Score<sup>b</sup></b> | -0.03 (-0.03, -0.02)*                   | -2.07 (-2.49, -1.65)*    | 1.58 (1.45, 1.71)*      | 1.34 (1.27, 1.43)*    | 1.35 (1.27, 1.43)*    | 1.12 (1.06, 1.18)* | 1.25 (1.15, 1.36)*   | 1.52 (1.36, 1.70)*    |
| <b>Length of stay at hospital (days)</b> |                                         |                          |                         |                       |                       |                    |                      |                       |
| 1 - 2                                    | Ref                                     | Ref                      | Ref                     | Ref                   | Ref                   | Ref                | Ref                  | Ref                   |
| 3 - 7                                    | -0.10 (-0.12, -0.09)*                   | -6.46 (-7.70, -5.22)*    | 10.61 (8.31, 13.53)*    | 3.72 (3.11, 4.45)*    | 3.11 (2.65, 3.66)*    | 2.19 (1.86, 2.59)* | 2.23 (1.72, 2.88)*   | 2.22 (1.57, 3.13)*    |
| 8 - 14                                   | -0.20 (-0.22, -0.18)*                   | -13.00 (-14.52, -11.48)* | 39.48 (28.73, 54.26)*   | 11.04 (8.87, 13.73)*  | 8.06 (6.54, 9.93)*    | 3.73 (3.05, 4.57)* | 5.73 (4.23, 7.76)*   | 9.12 (5.96, 13.97)*   |
| ≥ 15                                     | -0.28 (-0.31, -0.26)*                   | -18.39 (-20.52, -16.25)* | 103.66 (65.98, 162.88)* | 22.75 (16.73, 30.93)* | 14.88 (10.88, 20.36)* | 4.91 (3.63, 6.65)* | 11.30 (7.41, 17.24)* | 24.69 (13.58, 44.90)* |
| <b>Functional Capacity Index</b>         |                                         |                          |                         |                       |                       |                    |                      |                       |
| 1 (worse state)                          | -0.13 (-0.20, -0.06)*                   | -7.63 (-13.18, -2.08)*   | 4.12 (1.62, 10.48)*     | 2.95 (1.45, 5.99)*    | 3.04 (1.52, 6.08)*    | 1.43 (0.72, 2.85)  | 3.97 (1.46, 10.75)*  | 8.96 (2.28, 35.20)*   |
| 2                                        | -0.10 (-0.13, -0.06)*                   | -3.73 (-6.41, -1.05)*    | 9.85 (6.00, 16.17)*     | 2.47 (1.74, 3.52)*    | 2.85 (2.00, 4.05)*    | 2.16 (1.51, 3.09)* | 1.88 (1.12, 3.17)*   | 0.33 (0.16, 0.65)*    |
| 3                                        | -0.10 (-0.13, -0.06)*                   | -2.74 (-5.57, 0.08)      | 7.83 (4.70, 13.06)*     | 2.91 (2.00, 4.25)*    | 3.93 (2.69, 5.75)*    | 1.63 (1.13, 2.36)* | 1.67 (0.96, 2.92)    | 0.69 (0.33, 1.45)     |
| 4                                        | -0.11 (-0.12, -0.10)*                   | -6.01 (-7.15, -4.88)*    | 13.22 (10.56, 16.56)*   | 4.62 (3.94, 5.43)*    | 3.27 (2.82, 3.80)*    | 1.71 (1.48, 1.98)* | 2.05 (1.64, 2.56)*   | 1.37 (1.02, 1.84)*    |
| 5 (best possible state) <sup>a</sup>     | Ref                                     | Ref                      | Ref                     | Ref                   | Ref                   | Ref                | Ref                  | Ref                   |
| <b>Injury classification<sup>c</sup></b> |                                         |                          |                         |                       |                       |                    |                      |                       |
| <b>Lower extremity injury</b>            |                                         |                          |                         |                       |                       |                    |                      |                       |
| Pelvic injury                            | 0.71 (0.70, 0.72)                       | -4.60 (-6.70, -2.51)*    | 6.17 (4.27, 8.92)*      | 2.27 (1.71, 3.00)*    | 1.93 (1.47, 2.54)*    | 1.57 (1.19, 2.08)* | 1.37 (0.90, 2.10)    | 1.19 (0.68, 2.09)     |
| Hip fracture                             | -0.09 (-0.12, -0.06)*                   | -9.15 (-10.55, -7.74)*   | 20.99 (16.05, 27.46)*   | 5.59 (4.60, 6.81)*    | 3.77 (3.12, 4.55)*    | 1.68 (1.40, 2.02)* | 2.68 (2.04, 3.53)*   | 5.48 (3.75, 8.02)*    |

|                                          |                       |                          |                       |                       |                       |                      |                         |                             |
|------------------------------------------|-----------------------|--------------------------|-----------------------|-----------------------|-----------------------|----------------------|-------------------------|-----------------------------|
| Tibia, complex foot or femur fracture    | -0.13 (-0.15, -0.11)* | -2.37 (-4.09, -0.65)*    | 12.24 (8.98, 16.69)*  | 1.79 (1.42, 2.24)*    | 2.84 (2.27, 3.57)*    | 1.81 (1.44, 2.27)*   | 1.26 (0.90, 1.76)       | 0.53 (0.34, 0.82)*          |
| <b>Upper extremity injury</b>            |                       |                          |                       |                       |                       |                      |                         |                             |
| Shoulder and upper arm injury            | -0.07 (-0.10, -0.05)* | -2.57 (-4.40, -0.74)*    | 0.75 (0.55, 1.01)     | 2.47 (1.95, 3.14)*    | 1.8 (1.43, 2.27)*     | 2.21 (1.74, 2.80)*   | 1.21 (0.85, 1.72)       | 0.75 (0.47, 1.18)           |
| Radius, ulna or hand fracture            | -0.04 (-0.07, -0.02)* | 0.60 (-1.54, 2.74)       | 0.35 (0.24, 0.50)*    | 1.22 (0.92, 1.62)     | 1.06 (0.81, 1.38)     | 1.03 (0.78, 1.35)    | 0.77 (0.5, 1.17)        | 0.36 (0.21, 0.63)*          |
| <b>Traumatic brain injury</b>            |                       |                          |                       |                       |                       |                      |                         |                             |
| Head injury with AIS <=2                 | 0.01 (-0.02, 0.03)    | 1.40 (0.10, 2.69)*       | 0.66 (0.53, 0.82)*    | 0.50 (0.41, 0.59)*    | 0.63 (0.53, 0.74)*    | 0.67 (0.57, 0.80)*   | 0.82 (0.64, 1.06)       | 2.52 (1.80, 3.53)*          |
| Head injury with AIS >=3                 | 0.04 (0.03, 0.06)*    | -2.77 (-5.54, 0.00)*     | 1.84 (1.16, 2.91)*    | 1.17 (0.80, 1.71)     | 1.66 (1.16, 2.36)*    | 0.86 (0.61, 1.22)    | 2.44 (1.43, 4.15)*      | 13.11 (6.35, 27.06)*        |
| <b>Facial injury</b>                     | -0.03 (-0.06, 0.01)   | 1.99 (-0.40, 4.37)       | 0.37 (0.25, 0.56)*    | 0.64 (0.46, 0.90)*    | 0.65 (0.48, 0.88)     | 0.6 (0.44, 0.81)*    | 0.99 (0.61, 1.58)       | 1.34 (0.72, 2.47)           |
| <b>Thoracic injury</b>                   | 0.04 (0.00, 0.07)*    | 2.37 (-0.49, 5.23)       | 0.54 (0.33, 0.87)*    | 0.62 (0.42, 0.93)*    | 0.73 (0.51, 1.05)     | 0.61 (0.42, 0.89)*   | 0.83 (0.47, 1.48)       | 0.8 (0.38, 1.68)            |
| <b>Rib fracture</b>                      | 0.04 (0.00, 0.07)*    | -0.80 (-2.68, 1.09)      | 1 (0.73, 1.37)        | 0.81 (0.63, 1.05)     | 0.94 (0.74, 1.19)     | 1.35 (1.06, 1.72)*   | 0.65 (0.45, 0.95)*      | 1.05 (0.65, 1.71)           |
| <b>Abdominal injury</b>                  | 0.00 (-0.02, 0.03)    | 1.24 (-2.24, 4.73)       | 0.44 (0.24, 0.81)*    | 0.58 (0.35, 0.95)*    | 0.66 (0.42, 1.04)     | 0.56 (0.35, 0.88)*   | 1.06 (0.53, 2.14)       | 1.27 (0.51, 3.14)           |
| <b>Spine injury</b>                      |                       |                          |                       |                       |                       |                      |                         |                             |
| Spinal cord injury                       | -0.18 (-0.27, -0.09)* | -7.32 (-14.94, 0.29)     | 5.97 (1.8, 19.76)*    | 3.55 (1.41, 8.98)*    | 5.03 (1.95, 13.00)*   | 23.14 (6.63, 80.76)* | 2.97 (0.78, 11.27)      | 0.94 (0.16, 5.48)           |
| Stable vertebral fracture or disc injury | -0.05 (-0.08, -0.03)* | -4.10 (-6.27, -1.93)*    | 1.22 (0.85, 1.76)     | 1.57 (1.17, 2.10)*    | 1.88 (1.42, 2.49)*    | 2.43 (1.82, 3.25)*   | 1.23 (0.8, 1.87)        | 0.96 (0.55, 1.68)           |
| <b>Admission to Intensive Care Unit</b>  | -0.02 (-0.05, 0.01)   | -2.88 (-4.90, -0.86)*    | 0.80 (0.55, 1.16)     | 0.94 (0.72, 1.25)     | 1.26 (0.97, 1.65)     | 1.10 (0.84, 1.43)    | 1.16 (0.79, 1.71)       | 4.15 (2.51, 6.83)*          |
| <b>Pre-injury work status</b>            | 0.11 (0.09, 0.12)*    | 7.58 (6.40, 8.76)*       | 0.06 (0.05, 0.08)*    | 0.23 (0.19, 0.27)*    | 0.38 (0.33, 0.45)*    | 0.63 (0.54, 0.73)*   | 0.35 (0.28, 0.45)*      | 0.10 (0.07, 0.15)*          |
| <b>Educational level</b>                 |                       |                          |                       |                       |                       |                      |                         |                             |
| Low <sup>a</sup>                         | Ref                   | Ref                      | Ref                   | Ref                   | Ref                   | Ref                  | Ref                     | Ref                         |
| Middle                                   | 0.07 (0.06, 0.09)*    | 5.42 (4.15, 6.70)*       | 0.22 (0.17, 0.28)*    | 0.38 (0.32, 0.46)*    | 0.51 (0.43, 0.60)*    | 0.76 (0.65, 0.90)*   | 0.39 (0.31, 0.50)*      | 0.25 (0.18, 0.35)*          |
| High                                     | 0.11 (0.09, 0.13)*    | 6.74 (5.35, 8.13)*       | 0.18 (0.13, 0.23)*    | 0.35 (0.29, 0.43)*    | 0.37 (0.31, 0.45)*    | 0.48 (0.40, 0.57)*   | 0.25 (0.19, 0.33)*      | 0.18 (0.12, 0.26)*          |
| <b>Frailty</b>                           | -0.28 (-0.30, -0.26)* | -17.00 (-18.28, -15.73)* | 42.04 (30.13, 58.65)* | 17.43 (13.8, 22.02)*  | 10.32 (8.11, 13.12)*  | 3.53 (2.84, 4.39)*   | 20.90 (15.31, 28.54)*   | 181.79 (99.22, 333.08)*     |
| <b>Pre-injury status<sup>d</sup></b>     | 0.67 (0.64, 0.70)*    | 0.58 (0.55, 0.60)*       |                       |                       |                       |                      |                         |                             |
| No problems <sup>a</sup>                 |                       |                          | Ref                   | Ref                   | Ref                   | Ref                  | Ref                     | Ref                         |
| Moderate/severe problems                 |                       |                          | 71.89 (54.53, 94.77)* | 61.03 (47.05, 79.17)* | 15.01 (12.27, 18.36)* | 8.69 (7.29, 10.36)*  | 114.45 (79.19, 165.42)* | 3613.12 (1619.40, 8061.43)* |

\*p-value ≤ .05

<sup>a</sup>Reference category<sup>b</sup>Regression coefficients and odds ratios (95%) represents a 4 unit increase on the ISS scale.<sup>c</sup>Regression coefficients and odds ratios (95% CI) for patients suffering the injury compared to patients not having the injury.

<sup>d</sup>Regression coefficients (95% CI) for pre-injury EQ-5D utility score and the pre-injury EQ-VAS for EQ-5D utility and EQ-VAS respectively. Odds ratios (95% CI) for pre-injury moderate and severe problems on the dimensions of the EQ-5D questionnaire (pre-injury mobility, Self-care, Pain/discomfort, Anxiety/depression and cognition respectively for the columns).

*Abbreviations: AIS, Abbreviated Injury scale; ASA, American Society of Anaesthesiologists Classification; CI, Confidence Interval; Ref, Reference Category.*
